# Supplementary material for: Development of Dithieno[3,2-b:2′,3′-d]thiophene (DTT) Derivatives as Solution-Processable Small Molecular Semiconductors for Organic Thin Film Transistors
Source: MDPI journal article supplement (doi:10.3390/coatings11101222), 2021-10-08
Supplement: s1 [file s1]

Archive with 1 entries (1 files):
- coatings-1387980-supplementary.pdf
