# Supplementary material for: Development of Dithieno[3,2-b:2′,3′-d]thiophene (DTT) Derivatives as Solution-Processable Small Molecular Semiconductors for Organic Thin Film Transistors
Source: MDPI journal article supplement (doi:10.3390/coatings11101222), 2021-10-08
Supplement: s1 [file s1 › coatings-1387980-supplementary.pdf]

# Supplementary Materials: Development of Dithieno[3,2-b:2',3'-d]thiophene (DTT) Derivatives as Solution-Processable Small Molecular Semiconductors for Organic Thin Film Transistors

Eunjin Choi <sup>1,†</sup>, Yuhyeon Jang <sup>2,†</sup>, Dongil Ho <sup>1</sup>, Wookil Chae <sup>3</sup>, Taeshik Earmme <sup>3</sup>, Choongik Kim <sup>1,\*</sup> and SungYong Seo <sup>2,4,\*</sup>

<sup>1</sup> Department of Chemical and Biomolecular Engineering, Sogang University, Seoul 04107, Korea; dmswls997@naver.com (E.C.); hdnel@naver.com (D.H.)

<sup>2</sup> Department of Smart Green Technology Engineering, Pukyong National University, Busan 48513, Korea; dbgus2991@naver.com

<sup>3</sup> Department of Chemical Engineering, Hongik University, Seoul 04066, Korea; abomi93@naver.com (W.C.); earmme@hongik.ac.kr (T.E.)

<sup>4</sup> Department of Chemistry, Pukyong National University, Busan 48547, Korea

\* Correspondence: choongik@sogang.ac.kr (C.K.); syseo@pknu.ac.kr (S.S.); Tel.: +82-2-705-7964 (C.K.); +82-51-629-5594 (S.S.); Fax: +82-2-711-0439 (C.K.); +82-51-629-5583 (S.S.)

† These authors contributed equally to this work.

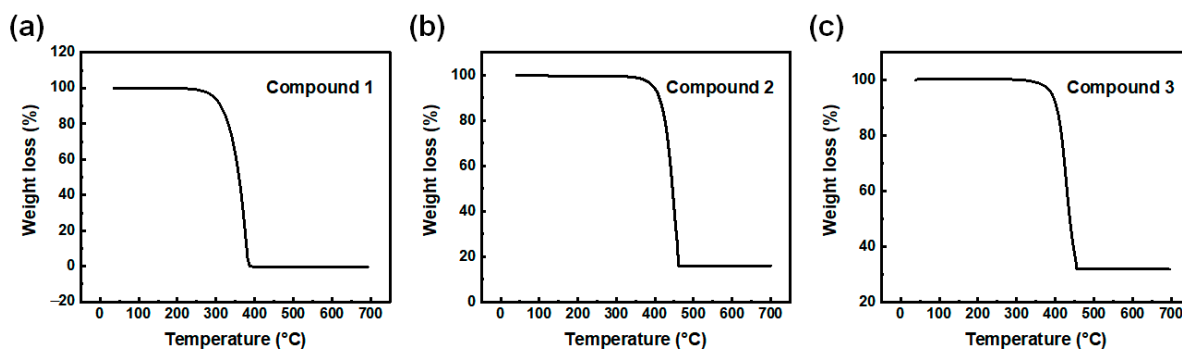

Figure S1. Thermogravimetric analysis (TGA) of (a) compound 1, (b) compound 2, and (c) compound 3.

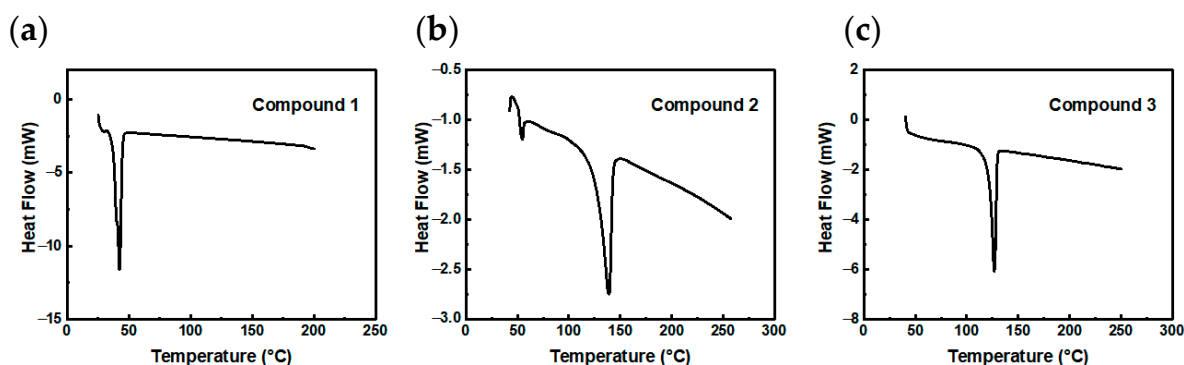

Figure S2. Differential scanning calorimetry (DSC) analysis of (a) compound 1, (b) compound 2, and (c) compound 3.

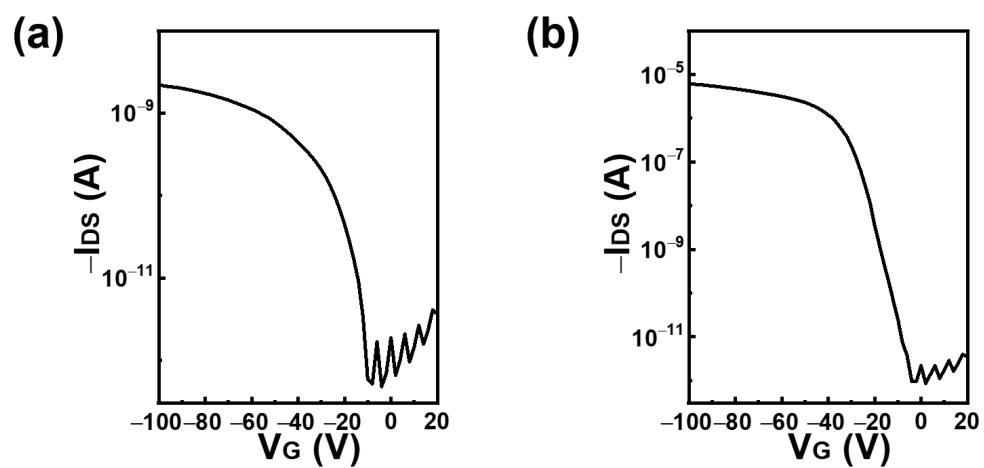

**Figure S3.** Representative transfer characteristics of the fabricated OFETs of (a) compound 1 and (b) compound 3.
